# Supplementary material
Source: PubMed Central journal article supplement (PMC8902536)
Supplement: ajtr0014-0772-f12.pdf [file ajtr0014-0772-f12.pdf]

## Identification of a novel ceRNA network in multiple sclerosis

**Supplementary Table 2.** List of differentially expressed miRNAs

| miRNA           | logFC      |
|-----------------|------------|
| hsa-miR-142-3p  | 4.2357085  |
| hsa-miR-186     | 2.8655732  |
| hsa-miR-98      | 2.83486    |
| hsa-miR-130b    | 2.8221545  |
| hsa-miR-7       | 2.4432054  |
| hsa-miR-629     | 2.2825346  |
| hsa-let-7c      | 2.1986221  |
| hsa-let-7b      | 2.0665432  |
| hsa-miR-619     | 2.0400192  |
| hsa-let-7i      | 2.0122884  |
| hsa-miR-140-5p  | 1.9960535  |
| hsa-miR-34a     | 1.9393444  |
| hsa-miR-892a    | 1.9002699  |
| hsa-miR-615-5p  | 1.8999755  |
| hsa-miR-145     | 1.8747742  |
| hsa-miR-942     | 1.8390816  |
| hsa-miR-148a    | 1.832381   |
| hsa-miR-126     | 1.8322806  |
| hsa-miR-1303    | 1.820051   |
| hsa-miR-501-5p  | 1.814394   |
| hsa-miR-608     | 1.8105159  |
| hsa-miR-513a-3p | 1.7980756  |
| hsa-let-7e      | 1.7511411  |
| hsa-miR-758     | 1.7443687  |
| hsa-miR-223     | 1.7135023  |
| hsa-miR-939     | 1.7101038  |
| hsa-let-7g      | 1.6996091  |
| hsa-miR-135a    | 1.5998915  |
| hsa-miR-625     | 1.5803306  |
| hsa-miR-1275    | 1.5745042  |
| hsa-miR-885-5p  | 1.5727329  |
| hsa-miR-658     | 1.5363959  |
| hsa-miR-516b    | 1.5155584  |
| hsa-miR-133a    | 1.5154452  |
| hsa-miR-1207-5p | 1.5098694  |
| hsa-miR-624     | 1.5051318  |
| hsa-miR-744     | 1.5032509  |
| hsa-miR-451     | 1.4904226  |
| hsa-miR-643     | 1.4800798  |
| hsa-miR-22      | 1.4712502  |
| hsa-miR-30d     | 1.4712471  |
| hsa-miR-765     | 1.4316639  |
| hsa-miR-1252    | 1.4127972  |
| hsa-miR-365     | 1.3680369  |
| hsa-miR-1911    | 1.3673465  |
| hsa-miR-29b     | 1.35631    |
| hsa-miR-200a    | 1.3394042  |
| hsa-miR-572     | 1.3369357  |
| hsa-miR-130a    | 1.3309718  |
| hsa-miR-943     | 1.3189531  |
| hsa-miR-199a-5p | 1.3058443  |
| hsa-miR-30e     | 1.2926271  |
| hsa-miR-1287    | 1.2442879  |
| hsa-miR-10b     | 1.2429673  |
| hsa-miR-633     | 1.2279873  |
| hsa-miR-1908    | 1.2208933  |
| hsa-miR-659     | 1.2076403  |
| hsa-miR-551b    | -1.2224948 |

## Identification of a novel ceRNA network in multiple sclerosis

|                 |            |
|-----------------|------------|
| hsa-miR-371-5p  | -1.2258024 |
| hsa-miR-138     | -1.2268572 |
| hsa-miR-551a    | -1.2494338 |
| hsa-miR-647     | -1.3045325 |
| hsa-miR-211     | -1.3164134 |
| hsa-miR-302f    | -1.3610912 |
| hsa-miR-95      | -1.3696805 |
| hsa-miR-513a-5p | -1.3711852 |
| hsa-miR-1910    | -1.3731038 |
| hsa-miR-654-3p  | -1.3948593 |
| hsa-miR-1270    | -1.438118  |
| hsa-miR-1256    | -1.4412986 |
| hsa-miR-548m    | -1.4456289 |
| hsa-miR-924     | -1.4534229 |
| hsa-miR-181d    | -1.4737541 |
| hsa-miR-641     | -1.4997038 |
| hsa-miR-1827    | -1.5029866 |
| hsa-miR-548l    | -1.5206597 |
| hsa-miR-10a     | -1.5798142 |
| hsa-miR-513b    | -1.588105  |
| hsa-miR-196a    | -1.5955017 |
| hsa-miR-19b     | -1.5961783 |
| hsa-miR-574-3p  | -1.5991436 |
| hsa-miR-30c     | -1.6551129 |
| hsa-miR-369-3p  | -1.6664258 |
| hsa-miR-513c    | -1.6797069 |
| hsa-miR-585     | -1.6874115 |
| hsa-miR-767-3p  | -1.698606  |
| hsa-miR-202     | -1.7138339 |
| hsa-miR-488     | -1.7141297 |
| hsa-miR-105     | -1.726449  |
| hsa-miR-99a     | -1.7748024 |
| hsa-miR-1249    | -1.8006722 |
| hsa-miR-644     | -1.8014929 |
| hsa-miR-379     | -1.8200307 |
| hsa-miR-1204    | -1.8259435 |
| hsa-miR-556-3p  | -1.8261462 |
| hsa-miR-609     | -1.8485651 |
| hsa-miR-382     | -1.8701316 |
| hsa-miR-218     | -1.8763228 |
| hsa-miR-299-3p  | -1.9087321 |
| hsa-miR-373     | -1.9617412 |
| hsa-miR-190b    | -1.9789102 |
| hsa-miR-548h    | -2.0524013 |
| hsa-miR-620     | -2.0609552 |
| hsa-miR-581     | -2.114451  |
| hsa-miR-610     | -2.1596633 |
| hsa-miR-875-5p  | -2.170514  |
| hsa-miR-651     | -2.1708898 |
| hsa-miR-125b    | -2.1779881 |
| hsa-miR-586     | -2.1830611 |
| hsa-miR-184     | -2.2018869 |
| hsa-miR-1306    | -2.205356  |
| hsa-miR-520d-3p | -2.2263496 |
| hsa-miR-593     | -2.2555876 |
| hsa-miR-455-5p  | -2.2946039 |
| hsa-let-7a      | -2.4571552 |
| hsa-miR-1914    | -2.4584416 |
| hsa-let-7f      | -2.4922172 |
| hsa-miR-212     | -2.654097  |
| hsa-miR-512-3p  | -3.3559523 |

---

## Identification of a novel ceRNA network in multiple sclerosis

**Supplementary Table 3.** Functional enriched analysis of the DEmRNAs

| Category | ID         | Term                                        | Genes                                                                                                                                                                                                                                                                                                                                                                                                                                                                                                                                                                                                                                                                                                                                                                                                                                                                                                                                                                                                                                                                                                                                                                                                     | p-value     |
|----------|------------|---------------------------------------------|-----------------------------------------------------------------------------------------------------------------------------------------------------------------------------------------------------------------------------------------------------------------------------------------------------------------------------------------------------------------------------------------------------------------------------------------------------------------------------------------------------------------------------------------------------------------------------------------------------------------------------------------------------------------------------------------------------------------------------------------------------------------------------------------------------------------------------------------------------------------------------------------------------------------------------------------------------------------------------------------------------------------------------------------------------------------------------------------------------------------------------------------------------------------------------------------------------------|-------------|
| BP       | GO:0019731 | antibacterial humoral response              | IGHM, DEFA4, DEFA1B, B2M, CAMP, LTF                                                                                                                                                                                                                                                                                                                                                                                                                                                                                                                                                                                                                                                                                                                                                                                                                                                                                                                                                                                                                                                                                                                                                                       | 0.000458014 |
| BP       | GO:0050853 | B cell receptor signaling pathway           | BLK, IGHM, CD79A, CD19, IGHV3-23, IGHD                                                                                                                                                                                                                                                                                                                                                                                                                                                                                                                                                                                                                                                                                                                                                                                                                                                                                                                                                                                                                                                                                                                                                                    | 0.001183328 |
| BP       | GO:0006955 | immune response                             | CXCL8, IGHV3-23, IFI6, SERPINB9, FCAR, TAPBP, VPREB3, ZEB1, IL7, IGHD, CEACAM8, DEFA1B, HLA-DOB, B2M, CD22, HLA-DQB1                                                                                                                                                                                                                                                                                                                                                                                                                                                                                                                                                                                                                                                                                                                                                                                                                                                                                                                                                                                                                                                                                      | 0.001529446 |
| BP       | GO:0050830 | defense response to Gram-positive bacterium | ADAM17, DEFA4, DEFA1B, LYZ, B2M, TIRAP, CAMP                                                                                                                                                                                                                                                                                                                                                                                                                                                                                                                                                                                                                                                                                                                                                                                                                                                                                                                                                                                                                                                                                                                                                              | 0.001614498 |
| BP       | GO:0045087 | innate immune response                      | BLK, IGHM, ANXA1, DDX3X, DEFA4, IGHV3-23, CYBB, TIRAP, LILRA5, CLEC7A, PCBP2, IGHD, DEFA1B, B2M, CAMP                                                                                                                                                                                                                                                                                                                                                                                                                                                                                                                                                                                                                                                                                                                                                                                                                                                                                                                                                                                                                                                                                                     | 0.004876241 |
| CC       | GO:0005833 | hemoglobin complex                          | HBM, HBG2, HBB, HBA2, AHSP, HBD                                                                                                                                                                                                                                                                                                                                                                                                                                                                                                                                                                                                                                                                                                                                                                                                                                                                                                                                                                                                                                                                                                                                                                           | 4.15122E-07 |
| CC       | GO:0005654 | nucleoplasm                                 | ATF2, RBM25, RIF1, CELF1, CHD9, SPPL2B, KIAA1033, RORA, SMC3, AFF3, CLINT1, SYNE2, ACTB, NAMPT, PPP6R3, POLK, TGIF1, DDX17, SRRM2, PNISR, RBM14, ANXA1, DUSP3, SCAF11, TEX10, PPP4R3B, SAFB, SETSIP, TIRAP, FOXF1, SGO2, ZEB1, TBL1XR1, THRAP3, HNRNPH1, KAT6A, PPIG, TOP1, TP53, SF1, FKBP5, HEMGN, PRKDC, ANKRD11, BOD1L1, ANKRD12, GATA2, EXOSC6, CLEC7A, UBN1, PCBP2, USP1, FEM1C, TBL1X, SPEN, EGR1, RBM39, KDM4B, ALYREF, NONO, STAT2, DNAJC14, FOSL2, NR4A2, MLLT10, SNRNP40, ESF1, PKN2, MDM4, HSPA1B                                                                                                                                                                                                                                                                                                                                                                                                                                                                                                                                                                                                                                                                                             | 1.72215E-06 |
| CC       | GO:0016020 | membrane                                    | CELF1, SPPL2B, PRF1, CD3G, PTPRK, CLINT1, SLC8A1, ACTB, TOMM22, ICAM1, LAMP1, CNTRL, CASP2, B2M, DDX17, EIF5A, ANXA3, APLP2, KRT1, SERPINB9, HBA2, CDKAL1, LRRC41, F5, TAPBP, ADAM17, PRKAR1A, HNRNPH1, HLA-DQB1, FKBP5, ARF6, KCNE3, CBFB, LUZP1, PRKDC, SELENBP1, APH1A, NT5E, RNF213, PCBP2, SNCA, MGEA5, SLC16A1, PLEKHA2, AMFR, ALYREF, NONO, PRRC2C, DNAJC14, TSPAN13, REEP3, GNAS, STT3A, KRAS, NAA15, CALR, CD24, CDS2                                                                                                                                                                                                                                                                                                                                                                                                                                                                                                                                                                                                                                                                                                                                                                            | 4.83176E-06 |
| CC       | GO:0005737 | cytoplasm                                   | ATF2, RIF1, SMC3, ACTB, LAMP1, CSPP1, NAMPT, NFATC2IP, NEK1, B2M, PNISR, SWAP70, LMO7, PPP4R3B, PLPP5, RAB30, ADAM17, PRKAR1A, PPIG, TP53, CDC42SE1, GGNBP2, KCNE3, UBA6, ANKRD11, ANKRD12, LPP, CD79A, RNF213, CLEC7A, PDGFC, PCBP2, STAP1, SCN3A, KLHDC10, EGR1, SYNRG, STYX, AZIN1, NR4A2, MLLT10, GLUD1, EIF2S3, GNAS, CALR, UBE2M, RBM25, DDX3X, CHD9, CELF1, CELF2, CD-CA7L, AFF3, SYNE2, OSBPL10, FCRLA, AKAP12, CA1, HINT3, CNTRL, PPP6R3, BLNK, CASP2, EPG5, EIF5A, RBM14, ANXA1, DUSP3, CNOT6L, ANXA3, ARG1, STRBP, TEX10, STRADB, CEP295, LIX1L, PAWR, SERPINB9, SETSIP, TIRAP, LRRC41, PTP4A1, ZEB1, HNRNPH1, CHI3L1, STRAP, LTF, ARPC4-TLLL3, TRAK2, FGD4, NT5E, ABLIM1, FEM1C, DEDD, SNCA, KDM4B, PLEKHA2, STAT2, HIPK3, P2RX5, SNRNP40, KRAS, PKN2, NAA15, HSPA1B                                                                                                                                                                                                                                                                                                                                                                                                                          | 5.00075E-05 |
| CC       | GO:0072562 | blood microparticle                         | IGHM, HBG2, KRT1, IGHV3-23, IGHD, HBB, HBA2, SLC4A1, HBD, HSPA1B, ACTB                                                                                                                                                                                                                                                                                                                                                                                                                                                                                                                                                                                                                                                                                                                                                                                                                                                                                                                                                                                                                                                                                                                                    | 6.68121E-05 |
| MF       | GO:0005515 | protein binding                             | ATF2, SPPL2B, PRF1, SLC4A1, RORA, SMC3, ACTB, SLC8A1, ICAM1, CRKL, TOMM22, TCL1A, LAMP1, NAMPT, NEK1, B2M, BORCS5, DDX17, SCAF11, SWAP70, APLP2, KRT1, EBF1, CYBB, CDKAL1, FOXF1, SGO2, ADAM17, TBL1XR1, PRKAR1A, KAT6A, ADAM9, PPIG, TP53, SF1, FKBP5, BLK, RTN3, KCNE3, CBFB, EPB42, YTHDC1, UBA6, PRKDC, GATA2, LPP, APH1A, CD79A, CLEC7A, CD19, PDGFC, PCBP2, STAP1, LONRF1, NADK, KLHDC10, EGR1, SYNRG, ALYREF, NONO, STYX, ARPC4, AZIN1, FOSL2, NR4A2, MLLT10, GLUD1, EIF2S3, IL7, STT3A, GNAS, CYCS, MDM4, CALR, CD24, CD22, CD200, UBE2M, IGHM, RBM25, ALAS2, DDX3X, MS4A3, CXCL8, CELF1, ITGB3, CDCA7L, HBB, C1ORF174, PTPRK, HBD, CLINT1, SYNE2, AKAP12, CA1, CNTRL, NFKBIZ, PPP6R3, BLNK, PHACTR2, CASP2, CCR3, TGIF1, SRGN, EIF5A, FCRL2, RBM14, ANXA1, CNOT6L, KLF13, SECISBP2L, STRBP, TEX10, STRADB, ATRX, PAWR, SERPINB9, HBA2, PAX5, SAFB, FAM126B, TIRAP, F5, TAPBP, FCER2, ZEB1, HNRNPH1, THRAP3, STRAP, CEACAM8, TOP1, MS4A1, NUP58, ARF6, LTF, HEMGN, RUSC1-AS1, SDC-CAG3, HDC, IFI6, TRAK2, PCNP, SELENBP1, ABLIM1, MAT2A, UBN1, USP1, FEM1C, AHSP, TBL1X, DEDD, SNCA, LRRC25, SPEN, RBM39, CD72, PLEKHA2, AMFR, STAT2, GOS2, SNX20, SNRNP40, KRAS, PKN2, NAA15, COPG1, CLC, HSPA1B | 1.10951E-10 |

## Identification of a novel ceRNA network in multiple sclerosis

|      |            |                                     |                                                                                                                                                                                                                                                               |             |
|------|------------|-------------------------------------|---------------------------------------------------------------------------------------------------------------------------------------------------------------------------------------------------------------------------------------------------------------|-------------|
| MF   | GO:0044822 | poly(A) RNA binding                 | RBM25, DDX3X, PRKDC, CELF1, YTHDC1, CELF2, SAMS1, CRKL, EXOSC6, ALKBH5, PCBP2, EIF5A, DDX17, SRRM2, SPEN, PNISR, RBM39, RBM14, SCAF11, SECISBP2L, ALYREF, NONO, STRBP, PRRC2C, SAFB, SNRNP40, THRAP3, HNRNP1, STRAP, ESF1, PKN2, PPIG, NAA15, CALR, TOP1, SF1 | 4.11234E-06 |
| MF   | GO:0005344 | oxygen transporter activity         | HBM, HBG2, HBB, HBA2, HBD                                                                                                                                                                                                                                     | 3.01877E-05 |
| MF   | GO:0019825 | oxygen binding                      | HBM, HBG2, HBB, HBA2, HBD                                                                                                                                                                                                                                     | 0.003784713 |
| MF   | GO:0019899 | enzyme binding                      | LAMP1, PRKDC, ITGB3, PCBP2, TSPAN5, PAWR, CASP2, MDM4, ARPC4, TP53, HSPA1B, TRAK2                                                                                                                                                                             | 0.006107352 |
| KEGG | hsa05416   | Viral myocarditis                   | PRF1, CYCS, HLA-DOB, ACTB, ICAM1, HLA-DQB1                                                                                                                                                                                                                    | 0.001825969 |
| KEGG | hsa04662   | B cell receptor signaling pathway   | CD79A, CD72, CD19, BLNK, KRAS, CD22                                                                                                                                                                                                                           | 0.004230988 |
| KEGG | hsa05164   | Influenza A                         | ATF2, CXCL8, STAT2, CYCS, HLA-DOB, HSPA1B, ACTB, ICAM1, HLA-DQB1                                                                                                                                                                                              | 0.005537628 |
| KEGG | hsa04612   | Antigen processing and presentation | CALR, B2M, HLA-DOB, HSPA1B, TAPBP, HLA-DQB1                                                                                                                                                                                                                   | 0.006385287 |
| KEGG | hsa05161   | Hepatitis B                         | ATF2, DDX3X, CXCL8, STAT2, CYCS, KRAS, TP53, TIRAP                                                                                                                                                                                                            | 0.007212606 |

**Supplementary Table 4. GO biological process terms for top 4 modules**

| Mode  | GO biological process | Description                                                | Genes                                       | adjust P-value |
|-------|-----------------------|------------------------------------------------------------|---------------------------------------------|----------------|
| mode1 | GO:0031640            | killing of cells of other organism                         | FCER2/LTF/LYZ/CAMP/DEFA4/ARG1               | 5.85E-09       |
| mode1 | GO:0044364            | disruption of cells of other organism                      | FCER2/LTF/LYZ/CAMP/DEFA4/ARG1               | 5.85E-09       |
| mode1 | GO:0001906            | cell killing                                               | FCER2/B2M/LTF/LYZ/CAMP/DEFA4/ARG1           | 1.85E-08       |
| mode1 | GO:0043312            | neutrophil degranulation                                   | HBB/B2M/LTF/CHI3L1/TCN1/LYZ/CAMP/DEFA4/ARG1 | 2.57E-08       |
| mode1 | GO:0002283            | neutrophil activation involved in immune response          | HBB/B2M/LTF/CHI3L1/TCN1/LYZ/CAMP/DEFA4/ARG1 | 2.57E-08       |
| mode1 | GO:0042119            | neutrophil activation                                      | HBB/B2M/LTF/CHI3L1/TCN1/LYZ/CAMP/DEFA4/ARG1 | 2.57E-08       |
| mode1 | GO:0002446            | neutrophil mediated immunity                               | HBB/B2M/LTF/CHI3L1/TCN1/LYZ/CAMP/DEFA4/ARG1 | 2.57E-08       |
| mode1 | GO:0015671            | oxygen transport                                           | HBB/HBA2/HBM/HBG2                           | 6.92E-08       |
| mode1 | GO:0015669            | gas transport                                              | HBB/HBA2/HBM/HBG2                           | 1.74E-07       |
| mode1 | GO:0035821            | modification of morphology or physiology of other organism | FCER2/LTF/LYZ/CAMP/DEFA4/ARG1               | 4.39E-07       |
| mode1 | GO:0006959            | humoral immune response                                    | FCER2/CD19/LTF/LYZ/CAMP/PAX5/DEFA4          | 1.20E-06       |
| mode1 | GO:0042744            | hydrogen peroxide catabolic process                        | HBB/HBA2/HBM/HBG2                           | 1.20E-06       |
| mode1 | GO:0015893            | drug transport                                             | HBB/HBA2/TCN1/HBM/HBG2/ARG1                 | 2.01E-06       |
| mode1 | GO:0017001            | antibiotic catabolic process                               | HBB/HBA2/HBM/HBG2                           | 1.04E-05       |
| mode1 | GO:0042743            | hydrogen peroxide metabolic process                        | HBB/HBA2/HBM/HBG2                           | 1.04E-05       |
| mode1 | GO:0051187            | cofactor catabolic process                                 | HBB/HBA2/HBM/HBG2                           | 2.00E-05       |
| mode1 | GO:0050829            | defense response to Gram-negative bacterium                | LTF/LYZ/CAMP/DEFA4                          | 5.08E-05       |
| mode1 | GO:0002227            | innate immune response in mucosa                           | LTF/CAMP/DEFA4                              | 5.59E-05       |
| mode1 | GO:0097237            | cellular response to toxic substance                       | HBB/HBA2/HBM/HBG2/ARG1                      | 7.86E-05       |
| mode1 | GO:0098869            | cellular oxidant detoxification                            | HBB/HBA2/HBM/HBG2                           | 7.86E-05       |
| mode1 | GO:1990748            | cellular detoxification                                    | HBB/HBA2/HBM/HBG2                           | 8.74E-05       |
| mode1 | GO:0019730            | antimicrobial humoral response                             | LTF/LYZ/CAMP/DEFA4                          | 0.000133       |
| mode1 | GO:0002385            | mucosal immune response                                    | LTF/CAMP/DEFA4                              | 0.000138       |
| mode1 | GO:0050853            | B cell receptor signaling pathway                          | CD79A/CD19/BLK/PAX5                         | 0.000138       |
| mode1 | GO:0098754            | detoxification                                             | HBB/HBA2/HBM/HBG2                           | 0.000138       |
| mode1 | GO:0002251            | organ or tissue specific immune response                   | LTF/CAMP/DEFA4                              | 0.000147       |
| mode1 | GO:0050832            | defense response to fungus                                 | LTF/DEFA4/ARG1                              | 0.000163       |
| mode1 | GO:0051291            | protein heterooligomerization                              | HBB/HBA2/HBM/HBG2                           | 0.000163       |
| mode1 | GO:0042737            | drug catabolic process                                     | HBB/HBA2/HBM/HBG2                           | 0.000199       |
| mode1 | GO:0019731            | antibacterial humoral response                             | LTF/CAMP/DEFA4                              | 0.000257       |
| mode1 | GO:0016999            | antibiotic metabolic process                               | HBB/HBA2/HBM/HBG2                           | 0.000257       |
| mode1 | GO:0009620            | response to fungus                                         | LTF/DEFA4/ARG1                              | 0.000318       |
| mode1 | GO:0031343            | positive regulation of cell killing                        | FCER2/B2M/ARG1                              | 0.000612       |

## Identification of a novel ceRNA network in multiple sclerosis

|       |            |                                                                                                                                         |                     |          |
|-------|------------|-----------------------------------------------------------------------------------------------------------------------------------------|---------------------|----------|
| mode1 | GO:0051673 | membrane disruption in other organism                                                                                                   | LTF/DEFA4           | 0.000766 |
| mode1 | GO:0061844 | antimicrobial humoral immune response mediated by antimicrobial peptide                                                                 | LTF/CAMP/DEFA4      | 0.000789 |
| mode1 | GO:0001895 | retina homeostasis                                                                                                                      | B2M/LTF/LYZ         | 0.000833 |
| mode1 | GO:0051851 | modification by host of symbiont morphology or physiology                                                                               | LTF/CAMP/ARG1       | 0.000915 |
| mode1 | GO:0051712 | positive regulation of killing of cells of other organism                                                                               | FCER2/ARG1          | 0.000979 |
| mode1 | GO:0051873 | killing by host of symbiont cells                                                                                                       | CAMP/ARG1           | 0.000979 |
| mode1 | GO:0051702 | interaction with symbiont                                                                                                               | LTF/CAMP/ARG1       | 0.000986 |
| mode1 | GO:0031341 | regulation of cell killing                                                                                                              | FCER2/B2M/ARG1      | 0.001222 |
| mode1 | GO:0051709 | regulation of killing of cells of other organism                                                                                        | FCER2/ARG1          | 0.001222 |
| mode1 | GO:0051852 | disruption by host of symbiont cells                                                                                                    | CAMP/ARG1           | 0.001222 |
| mode1 | GO:0050830 | defense response to Gram-positive bacterium                                                                                             | LYZ/CAMP/DEFA4      | 0.001423 |
| mode1 | GO:0050851 | antigen receptor-mediated signaling pathway                                                                                             | CD79A/CD19/BLK/PAX5 | 0.001423 |
| mode1 | GO:0051883 | killing of cells in other organism involved in symbiotic interaction                                                                    | CAMP/ARG1           | 0.001505 |
| mode1 | GO:0072593 | reactive oxygen species metabolic process                                                                                               | HBB/HBA2/HBM/HBG2   | 0.001742 |
| mode1 | GO:0051818 | disruption of cells of other organism involved in symbiotic interaction                                                                 | CAMP/ARG1           | 0.001837 |
| mode1 | GO:0051817 | modification of morphology or physiology of other organism involved in symbiotic interaction                                            | LTF/CAMP/ARG1       | 0.002191 |
| mode1 | GO:0042742 | defense response to bacterium                                                                                                           | LTF/LYZ/CAMP/DEFA4  | 0.002855 |
| mode1 | GO:0050855 | regulation of B cell receptor signaling pathway                                                                                         | BLK/PAX5            | 0.003108 |
| mode1 | GO:0002705 | positive regulation of leukocyte mediated immunity                                                                                      | FCER2/B2M/ARG1      | 0.003278 |
| mode1 | GO:0002237 | response to molecule of bacterial origin                                                                                                | B2M/LTF/DEFA4/ARG1  | 0.003321 |
| mode1 | GO:0002724 | regulation of T cell cytokine production                                                                                                | B2M/ARG1            | 0.003726 |
| mode1 | GO:0042542 | response to hydrogen peroxide                                                                                                           | HBB/HBA2/ARG1       | 0.003847 |
| mode1 | GO:0002822 | regulation of adaptive immune response based on somatic recombination of immune receptors built from immunoglobulin superfamily domains | FCER2/B2M/ARG1      | 0.00402  |
| mode1 | GO:0002706 | regulation of lymphocyte mediated immunity                                                                                              | FCER2/B2M/ARG1      | 0.004112 |
| mode1 | GO:0043900 | regulation of multi-organism process                                                                                                    | FCER2/LTF/CAMP/ARG1 | 0.004374 |
| mode1 | GO:0002819 | regulation of adaptive immune response                                                                                                  | FCER2/B2M/ARG1      | 0.004914 |
| mode1 | GO:0002369 | T cell cytokine production                                                                                                              | B2M/ARG1            | 0.006292 |
| mode1 | GO:0002429 | immune response-activating cell surface receptor signaling pathway                                                                      | CD79A/CD19/BLK/PAX5 | 0.006292 |
| mode1 | GO:0002697 | regulation of immune effector process                                                                                                   | FCER2/CD19/B2M/ARG1 | 0.007715 |
| mode1 | GO:0002768 | immune response-regulating cell surface receptor signaling pathway                                                                      | CD79A/CD19/BLK/PAX5 | 0.007988 |
| mode1 | GO:0015701 | bicarbonate transport                                                                                                                   | HBB/HBA2            | 0.008015 |
| mode1 | GO:0002703 | regulation of leukocyte mediated immunity                                                                                               | FCER2/B2M/ARG1      | 0.008508 |
| mode1 | GO:0071222 | cellular response to lipopolysaccharide                                                                                                 | LTF/DEFA4/ARG1      | 0.008755 |
| mode1 | GO:0043903 | regulation of symbiosis, encompassing mutualism through parasitism                                                                      | LTF/CAMP/ARG1       | 0.009136 |
| mode1 | GO:0071219 | cellular response to molecule of bacterial origin                                                                                       | LTF/DEFA4/ARG1      | 0.009391 |
| mode1 | GO:0002699 | positive regulation of immune effector process                                                                                          | FCER2/B2M/ARG1      | 0.00965  |
| mode1 | GO:0001894 | tissue homeostasis                                                                                                                      | B2M/LTF/LYZ         | 0.011173 |
| mode1 | GO:0000302 | response to reactive oxygen species                                                                                                     | HBB/HBA2/ARG1       | 0.011452 |
| mode1 | GO:0001912 | positive regulation of leukocyte mediated cytotoxicity                                                                                  | B2M/ARG1            | 0.011635 |
| mode1 | GO:0051896 | regulation of protein kinase B signaling                                                                                                | CD19/CHI3L1/BANK1   | 0.011708 |
| mode1 | GO:0071216 | cellular response to biotic stimulus                                                                                                    | LTF/DEFA4/ARG1      | 0.011708 |
| mode1 | GO:0050854 | regulation of antigen receptor-mediated signaling pathway                                                                               | BLK/PAX5            | 0.011991 |
| mode1 | GO:0046686 | response to cadmium ion                                                                                                                 | B2M/ARG1            | 0.01443  |
| mode1 | GO:0043491 | protein kinase B signaling                                                                                                              | CD19/CHI3L1/BANK1   | 0.014971 |
| mode1 | GO:0001818 | negative regulation of cytokine production                                                                                              | LTF/BANK1/ARG1      | 0.01522  |
| mode1 | GO:0002709 | regulation of T cell mediated immunity                                                                                                  | B2M/ARG1            | 0.01522  |
| mode1 | GO:0001910 | regulation of leukocyte mediated cytotoxicity                                                                                           | B2M/ARG1            | 0.019855 |
| mode1 | GO:0002718 | regulation of cytokine production involved in immune response                                                                           | B2M/ARG1            | 0.020121 |
| mode1 | GO:0055072 | iron ion homeostasis                                                                                                                    | B2M/LTF             | 0.023585 |
| mode1 | GO:0060333 | interferon-gamma-mediated signaling pathway                                                                                             | B2M/ARG1            | 0.026678 |
| mode1 | GO:0046677 | response to antibiotic                                                                                                                  | HBB/HBA2/ARG1       | 0.027351 |
| mode1 | GO:0032496 | response to lipopolysaccharide                                                                                                          | LTF/DEFA4/ARG1      | 0.027351 |
| mode1 | GO:0002367 | cytokine production involved in immune response                                                                                         | B2M/ARG1            | 0.028622 |

## Identification of a novel ceRNA network in multiple sclerosis

|       |            |                                                                                                                                                  |                                  |          |
|-------|------------|--------------------------------------------------------------------------------------------------------------------------------------------------|----------------------------------|----------|
| mode1 | GO:0002824 | positive regulation of adaptive immune response based on somatic recombination of immune receptors built from immunoglobulin superfamily domains | FCER2/B2M                        | 0.031253 |
| mode1 | GO:0002449 | lymphocyte mediated immunity                                                                                                                     | FCER2/B2M/ARG1                   | 0.031253 |
| mode1 | GO:0006898 | receptor-mediated endocytosis                                                                                                                    | HBB/B2M/HBA2                     | 0.031407 |
| mode1 | GO:0002456 | T cell mediated immunity                                                                                                                         | B2M/ARG1                         | 0.031425 |
| mode1 | GO:0002460 | adaptive immune response based on somatic recombination of immune receptors built from immunoglobulin superfamily domains                        | FCER2/B2M/ARG1                   | 0.031838 |
| mode1 | GO:0001909 | leukocyte mediated cytotoxicity                                                                                                                  | B2M/ARG1                         | 0.031838 |
| mode1 | GO:0002708 | positive regulation of lymphocyte mediated immunity                                                                                              | FCER2/B2M                        | 0.031838 |
| mode1 | GO:0002821 | positive regulation of adaptive immune response                                                                                                  | FCER2/B2M                        | 0.031838 |
| mode1 | GO:0000041 | transition metal ion transport                                                                                                                   | B2M/TCN1                         | 0.03449  |
| mode1 | GO:0002920 | regulation of humoral immune response                                                                                                            | FCER2/CD19                       | 0.044423 |
| mode1 | GO:0002831 | regulation of response to biotic stimulus                                                                                                        | LTF/ARG1                         | 0.046705 |
| mode1 | GO:0002700 | regulation of production of molecular mediator of immune response                                                                                | B2M/ARG1                         | 0.048312 |
| mode1 | GO:0055076 | transition metal ion homeostasis                                                                                                                 | B2M/LTF                          | 0.049451 |
| mode1 | GO:0060249 | anatomical structure homeostasis                                                                                                                 | B2M/LTF/LYZ                      | 0.049451 |
| mode1 | GO:0051250 | negative regulation of lymphocyte activation                                                                                                     | BANK1/ARG1                       | 0.049636 |
| mode2 | GO:0000209 | protein polyubiquitination                                                                                                                       | RNF213/LMO7/LONRF1               | 0.001492 |
| mode2 | GO:0043687 | post-translational protein modification                                                                                                          | LRRC41/UBE2M/LMO7                | 0.002048 |
| mode2 | GO:0045116 | protein neddylation                                                                                                                              | UBE2M                            | 0.046956 |
| mode3 | GO:0042743 | hydrogen peroxide metabolic process                                                                                                              | SNCA/HBD/CYBB                    | 0.016945 |
| mode3 | GO:0030520 | intracellular estrogen receptor signaling pathway                                                                                                | RBM14/DDX17/SAFB                 | 0.016945 |
| mode3 | GO:0048545 | response to steroid hormone                                                                                                                      | RBM14/CYBB/DDX17/SAFB/3ARG1      | 0.018909 |
| mode3 | GO:0020027 | hemoglobin metabolic process                                                                                                                     | ALAS2/AHSP                       | 0.025107 |
| mode3 | GO:0008380 | RNA splicing                                                                                                                                     | HNRNPH1/DDX17/NONO/SNRNP40/SRRM2 | 0.025472 |
| mode3 | GO:0071383 | cellular response to steroid hormone stimulus                                                                                                    | RBM14/DDX17/SAFB/3ARG1           | 0.028159 |
| mode3 | GO:0072593 | reactive oxygen species metabolic process                                                                                                        | SNCA/HBD/CYBB/3ARG1              | 0.028904 |
| mode3 | GO:0034599 | cellular response to oxidative stress                                                                                                            | SNCA/CYBB/4841/CYCS              | 0.028904 |
| mode3 | GO:1903409 | reactive oxygen species biosynthetic process                                                                                                     | SNCA/CYBB/3ARG1                  | 0.028904 |
| mode3 | GO:0043280 | positive regulation of cysteine-type endopeptidase activity involved in apoptotic process                                                        | SNCA/DDX3X/CYCS                  | 0.031828 |
| mode3 | GO:0001666 | response to hypoxia                                                                                                                              | ALAS2/EGR1/CYBB/3ARG1            | 0.031828 |
| mode3 | GO:0036293 | response to decreased oxygen levels                                                                                                              | ALAS2/EGR1/CYBB/3ARG1            | 0.031828 |
| mode3 | GO:0030518 | intracellular steroid hormone receptor signaling pathway                                                                                         | RBM14/DDX17/SAFB                 | 0.031828 |
| mode3 | GO:2001056 | positive regulation of cysteine-type endopeptidase activity                                                                                      | SNCA/DDX3X/CYCS                  | 0.031828 |
| mode3 | GO:0070482 | response to oxygen levels                                                                                                                        | ALAS2/EGR1/CYBB/3ARG1            | 0.031828 |
| mode3 | GO:0042744 | hydrogen peroxide catabolic process                                                                                                              | SNCA/HBD                         | 0.031828 |
| mode3 | GO:0016999 | antibiotic metabolic process                                                                                                                     | SNCA/HBD/CYBB                    | 0.031828 |
| mode3 | GO:0070555 | response to interleukin-1                                                                                                                        | SNCA/EGR1/3ARG1                  | 0.031828 |
| mode3 | GO:0000377 | RNA splicing, via transesterification reactions with bulged adenosine as nucleophile                                                             | HNRNPH1/DDX17/SNRNP40/SRRM2      | 0.031828 |
| mode3 | GO:0000398 | mRNA splicing, via spliceosome                                                                                                                   | HNRNPH1/DDX17/SNRNP40/SRRM2      | 0.031828 |
| mode3 | GO:0071456 | cellular response to hypoxia                                                                                                                     | EGR1/CYBB/3ARG1                  | 0.031828 |
| mode3 | GO:0000375 | RNA splicing, via transesterification reactions                                                                                                  | HNRNPH1/DDX17/SNRNP40/SRRM2      | 0.031828 |
| mode3 | GO:0036294 | cellular response to decreased oxygen levels                                                                                                     | EGR1/CYBB/3ARG1                  | 0.034505 |
| mode3 | GO:0010950 | positive regulation of endopeptidase activity                                                                                                    | SNCA/DDX3X/CYCS                  | 0.034505 |
| mode3 | GO:0015701 | bicarbonate transport                                                                                                                            | SLC4A1/7S9                       | 0.036528 |
| mode3 | GO:0046688 | response to copper ion                                                                                                                           | SNCA/3ARG1                       | 0.036528 |
| mode3 | GO:0022900 | electron transport chain                                                                                                                         | SNCA/CYBB/CYCS                   | 0.036528 |
| mode3 | GO:0007157 | heterophilic cell-cell adhesion via plasma membrane cell adhesion molecules                                                                      | 3ARG1/CEACAM8                    | 0.036528 |
| mode3 | GO:0071453 | cellular response to oxygen levels                                                                                                               | EGR1/CYBB/3ARG1                  | 0.036755 |
| mode3 | GO:0010952 | positive regulation of peptidase activity                                                                                                        | SNCA/DDX3X/CYCS                  | 0.036755 |
| mode3 | GO:0043401 | steroid hormone mediated signaling pathway                                                                                                       | RBM14/DDX17/SAFB                 | 0.036755 |
| mode3 | GO:0006979 | response to oxidative stress                                                                                                                     | SNCA/CYBB/NONO/CYCS              | 0.039168 |

## Identification of a novel ceRNA network in multiple sclerosis

|       |            |                                                                                  |                  |          |
|-------|------------|----------------------------------------------------------------------------------|------------------|----------|
| mode3 | GO:0043281 | regulation of cysteine-type endopeptidase activity involved in apoptotic process | SNCA/DDX3X/CYCS  | 0.043551 |
| mode3 | GO:0032722 | positive regulation of chemokine production                                      | EGR1/DDX3X       | 0.043551 |
| mode3 | GO:0017001 | antibiotic catabolic process                                                     | SNCA/HBD         | 0.047378 |
| mode3 | GO:0042108 | positive regulation of cytokine biosynthetic process                             | EGR1/CYBB        | 0.047378 |
| mode3 | GO:2001234 | negative regulation of apoptotic signaling pathway                               | 3ARG1/NONO/DDX3X | 0.047378 |
| mode4 | GO:0042113 | B cell activation                                                                | BLNK/MS4A1/CD22  | 0.004031 |
| mode4 | GO:0042100 | B cell proliferation                                                             | MS4A1/CD22       | 0.008512 |
| mode4 | GO:0002377 | immunoglobulin production                                                        | VPREB3/CD22      | 0.021385 |
| mode4 | GO:0046651 | lymphocyte proliferation                                                         | MS4A1/CD22       | 0.021385 |
| mode4 | GO:0032943 | mononuclear cell proliferation                                                   | MS4A1/CD22       | 0.021385 |
| mode4 | GO:0002440 | production of molecular mediator of immune response                              | VPREB3/CD22      | 0.021385 |
| mode4 | GO:0070661 | leukocyte proliferation                                                          | MS4A1/CD22       | 0.021385 |
| mode4 | GO:0002638 | negative regulation of immunoglobulin production                                 | CD22             | 0.021385 |
| mode4 | GO:0006959 | humoral immune response                                                          | BLNK/MS4A1       | 0.02702  |
| mode4 | GO:0051023 | regulation of immunoglobulin secretion                                           | CD22             | 0.027968 |
| mode4 | GO:0048305 | immunoglobulin secretion                                                         | CD22             | 0.029651 |
| mode4 | GO:0050855 | regulation of B cell receptor signaling pathway                                  | CD22             | 0.029852 |
| mode4 | GO:0050858 | negative regulation of antigen receptor-mediated signaling pathway               | CD22             | 0.029852 |
| mode4 | GO:0050849 | negative regulation of calcium-mediated signaling                                | CD22             | 0.035143 |
| mode4 | GO:0002701 | negative regulation of production of molecular mediator of immune response       | CD22             | 0.035143 |

**Supplementary Table 5. KEGG enriched pathways for top 4 modules**

| Mode  | Pathway ID | Description                                          | Genes           | adjust <i>P</i> -value |
|-------|------------|------------------------------------------------------|-----------------|------------------------|
| mode1 | hsa05143   | African trypanosomiasis                              | HBB/HBA2        | 0.011927               |
| mode1 | hsa05340   | Primary immunodeficiency                             | CD79A/CD19      | 0.011927               |
| mode1 | hsa05144   | Malaria                                              | HBB/HBA2        | 0.011927               |
| mode1 | hsa05169   | Epstein-Barr virus infection                         | FCER2/CD19/B2M  | 0.011927               |
| mode1 | hsa04662   | B cell receptor signaling pathway                    | CD79A/CD19      | 0.020777               |
| mode1 | hsa04970   | Salivary secretion                                   | LYZ/CAMP        | 0.020777               |
| mode1 | hsa05150   | Staphylococcus aureus infection                      | CAMP/DEFA4      | 0.020777               |
| mode1 | hsa04640   | Hematopoietic cell lineage                           | FCER2/CD19      | 0.020777               |
| mode2 | hsa04120   | Ubiquitin mediated proteolysis                       | UBA6/UBE2M      | 0.001756               |
| mode2 | hsa04520   | Adherens junction                                    | LMO7            | 0.026044               |
| mode3 | hsa04933   | AGE-RAGE signaling pathway in diabetic complications | EGR1/CYBB/ICAM1 | 0.018172               |
| mode4 | hsa04662   | B cell receptor signaling pathway                    | CD72/BLNK/CD22  | 2.77E-05               |
| mode4 | hsa04640   | Hematopoietic cell lineage                           | MS4A1/CD22      | 0.00305                |
| mode4 | hsa05340   | Primary immunodeficiency                             | BLNK            | 0.043444               |
